# Supplementary material for: Growth reaction norms of domesticated, wild and hybrid Atlantic salmon families in response to differing social and physical environments
Source: PubMed Central journal article supplement (PMC4231500; doi:10.1186/1471-2148-13-234), 2013-10-28

TEMPERATURE °C

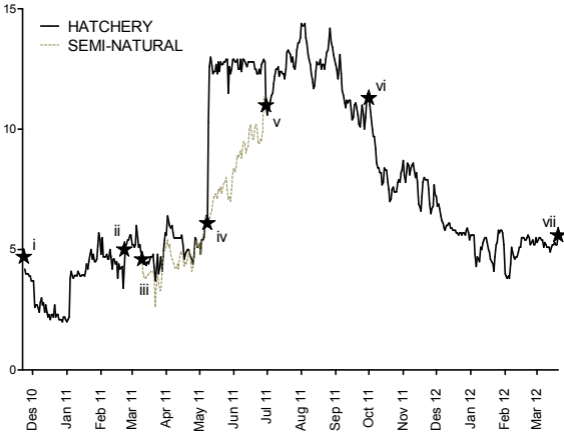

Supplement: 1471-2148-13-234-S2.pdf [file 1471-2148-13-234-S2.pdf]
